# Supplementary material for: Erythropoietin guides multipotent hematopoietic progenitor cells toward an erythroid fate
Source: PubMed Central journal article supplement — J Exp Med. 2014 Feb 10;211(2):181–8. doi: 10.1084/jem.20131189 (PMC3920567; doi:10.1084/jem.20131189), 2014-02-10
Supplement: supp_jem.20131189_JEM_20131189_sm.pdf [file supp_jem.20131189_JEM_20131189_sm.pdf]

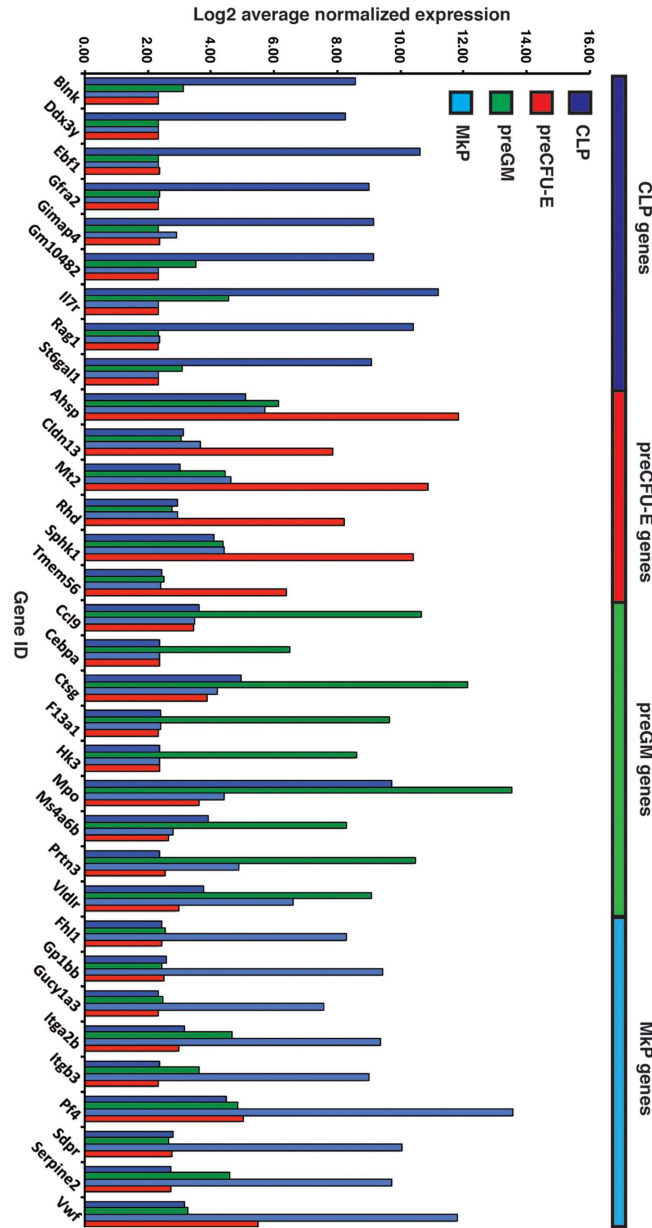

**Figure S1. Identification of progenitor-specific gene sets.** Genes selectively expressed in early lineage-committed progenitors of the erythroid (preCFU-E), Mk (MkP), myeloid (preGM), and lymphoid (CLP) lineages. Each value is the mean of at least three individual Affymetrix microarray-based determinations. Differentially expressed genes were manually curated to identify those with specific, high-level expression in each particular progenitor population. The underlying microarray data are listed in [Table S1](#).

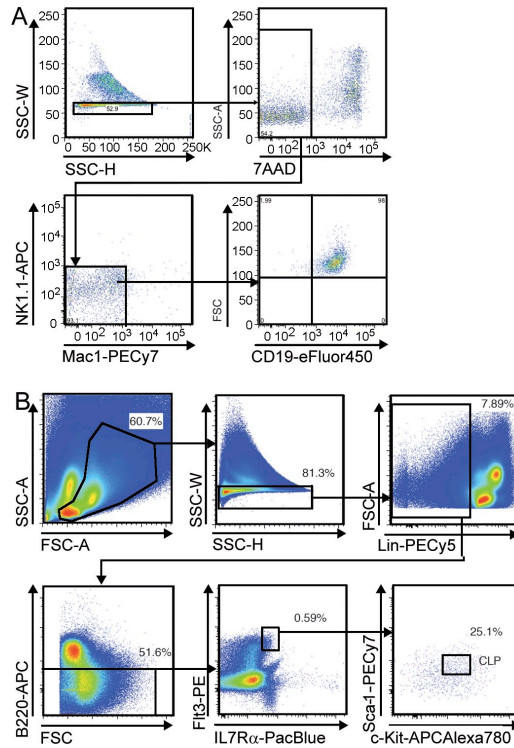

**Figure S2. Gating strategy for the identification of CLPs and their B cell progeny.** (A) Identification of CLP B cell progeny in OP9 single cell cultures. Cells were identified as live singlets based on scatter and 7-AAD staining, and B cells identified as Mac-1<sup>-</sup>NK1.1<sup>-</sup>CD19<sup>+</sup>. (B) Gating strategy for CLPs. For each gate the percentage of the gated population relative to the parental population is indicated. CLPs were defined as Lin/7AAD<sup>-</sup>B220<sup>-</sup>IL7Rα<sup>+</sup>Fit3<sup>+</sup>Sca-1<sup>lo</sup>c-Kit<sup>lo</sup> singlets.

Tables S1, S2, and S3 are provided as Excel files.
